# Supplementary material for: Synthesis of a sumanenyl hafnocene complex
Source: Royal Society of Chemistry journal article supplement (doi:10.1039/c9qo00140a), 2019-01-01

## Supplementary Information

### Synthesis of sumanenyl hafnocene complex

Toru Amaya,<sup>\*a</sup> Shun Katoh,<sup>a</sup> Toshiyuki Moriuchi<sup>a,c</sup> and Toshikazu Hirao<sup>\*a,b</sup>

<sup>a</sup> Department of Applied Chemistry, Graduate School of Engineering, Osaka University, Yamada-oka, Suita, Osaka 565-0871, Japan

<sup>b</sup> Present address: The Institute of Scientific and Industrial Research, Osaka University, Mihoga-oka, Ibaraki, Osaka 567-0047, Japan

<sup>c</sup> Present address: Division of Molecular Materials Science, Graduate School of Science, Osaka City University, 3-3-138 Sugimoto, Sumiyoshi-ku, Osaka 558-8585, Japan

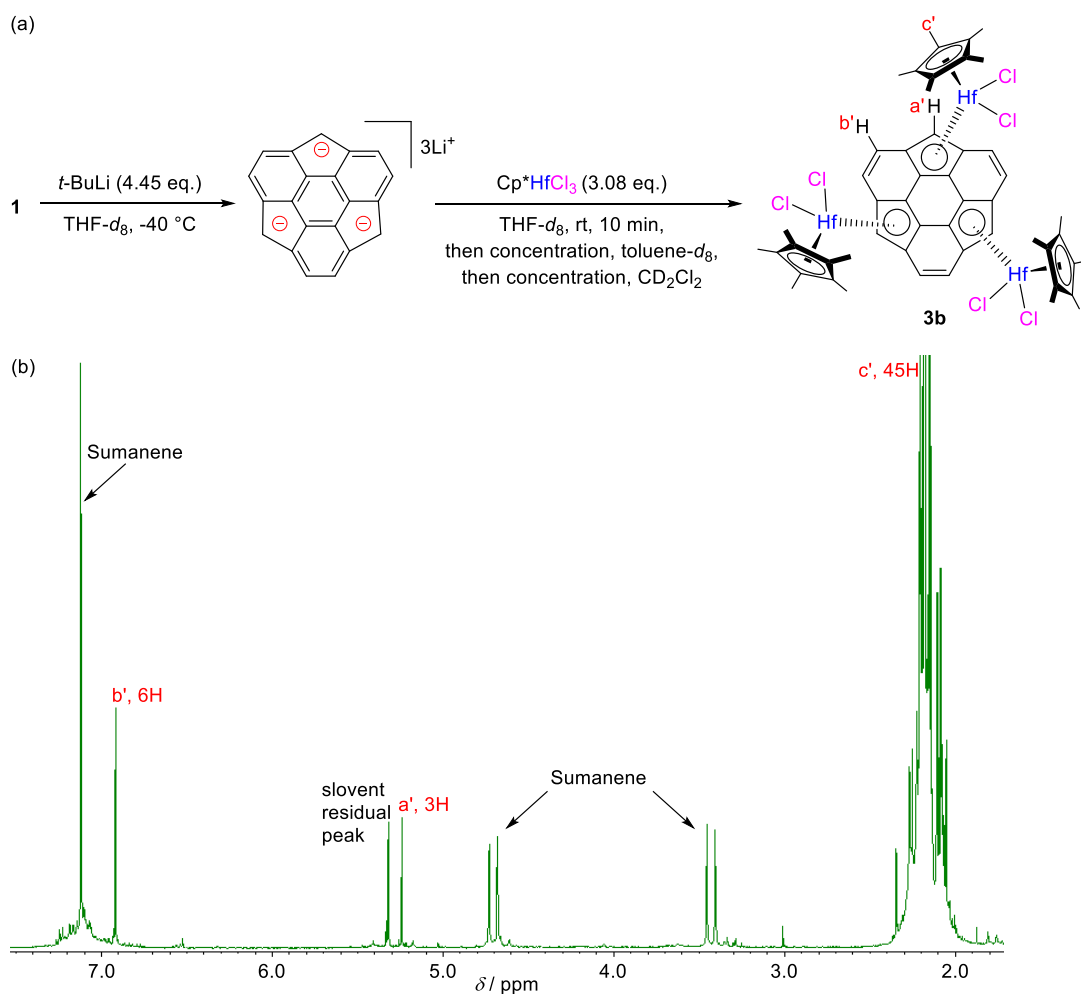

**Scheme S1.** (a). Synthesis of **3b** and (b) its crude  $^1\text{H}$  NMR spectrum (400 MHz,  $\text{CD}_2\text{Cl}_2$ ).

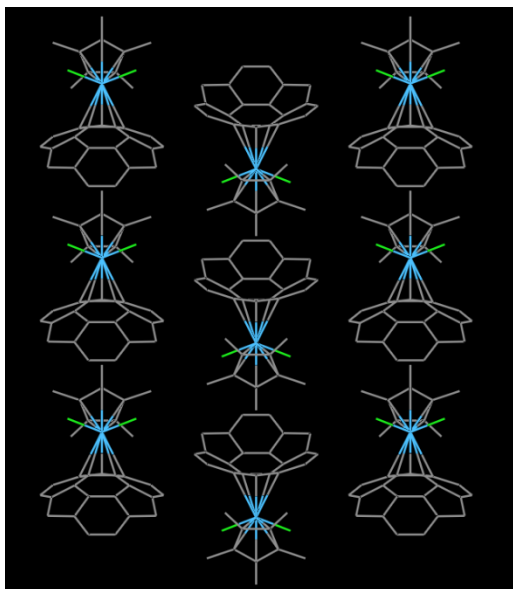

**View 1**

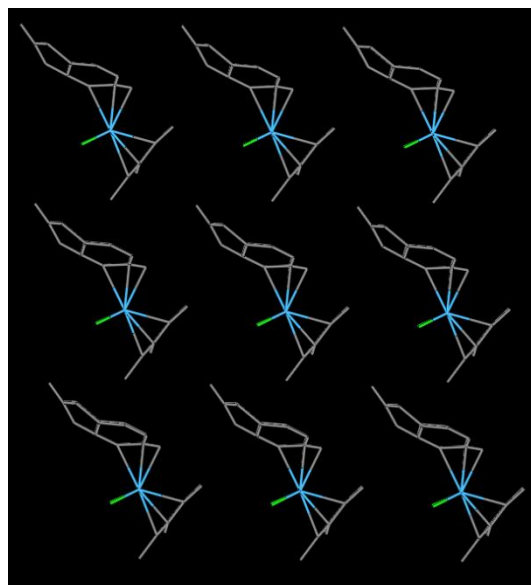

**View 2**

**Figure S1.** Packing structure of Cp\*(sumanenyl)HfCl<sub>2</sub> (**4**).

$^{13}\text{C}$  NMR spectrum of **4** (100 MHz,  $\text{CD}_2\text{Cl}_2$ )

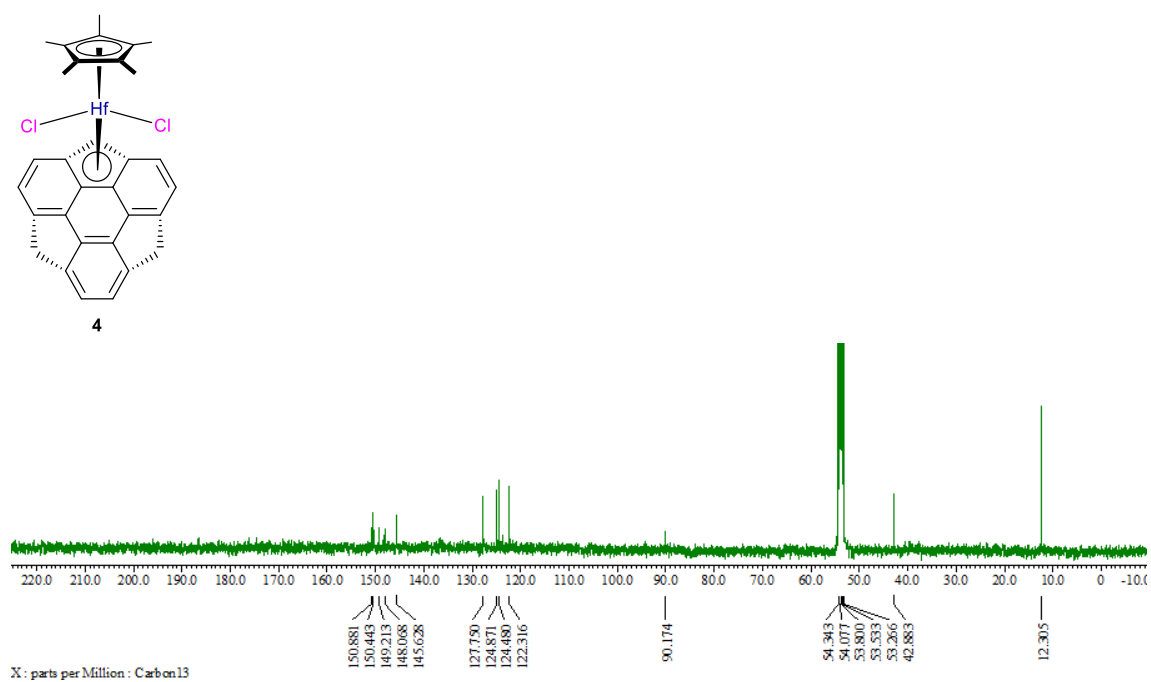

Enlarged view

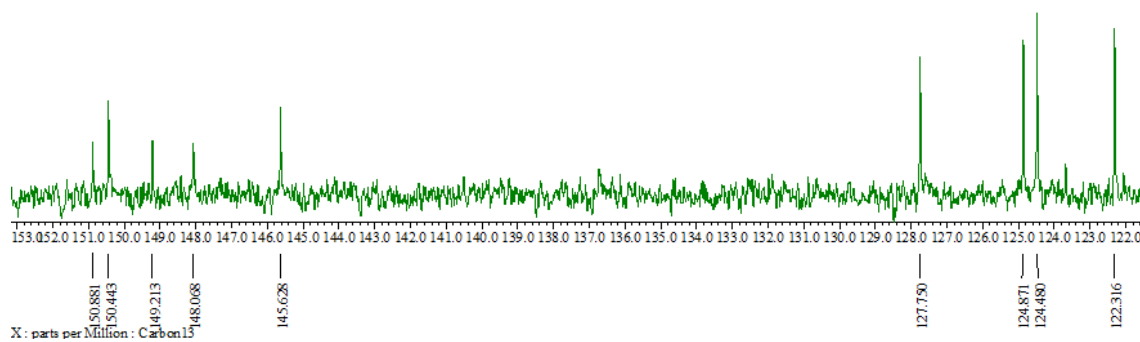

$^1\text{H}$  NMR spectrum of  $\text{Cp}^*(\text{fluorenyl})\text{HfCl}_2$  (400 MHz,  $\text{CD}_2\text{Cl}_2$ )

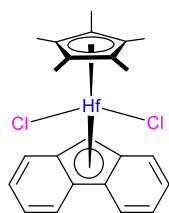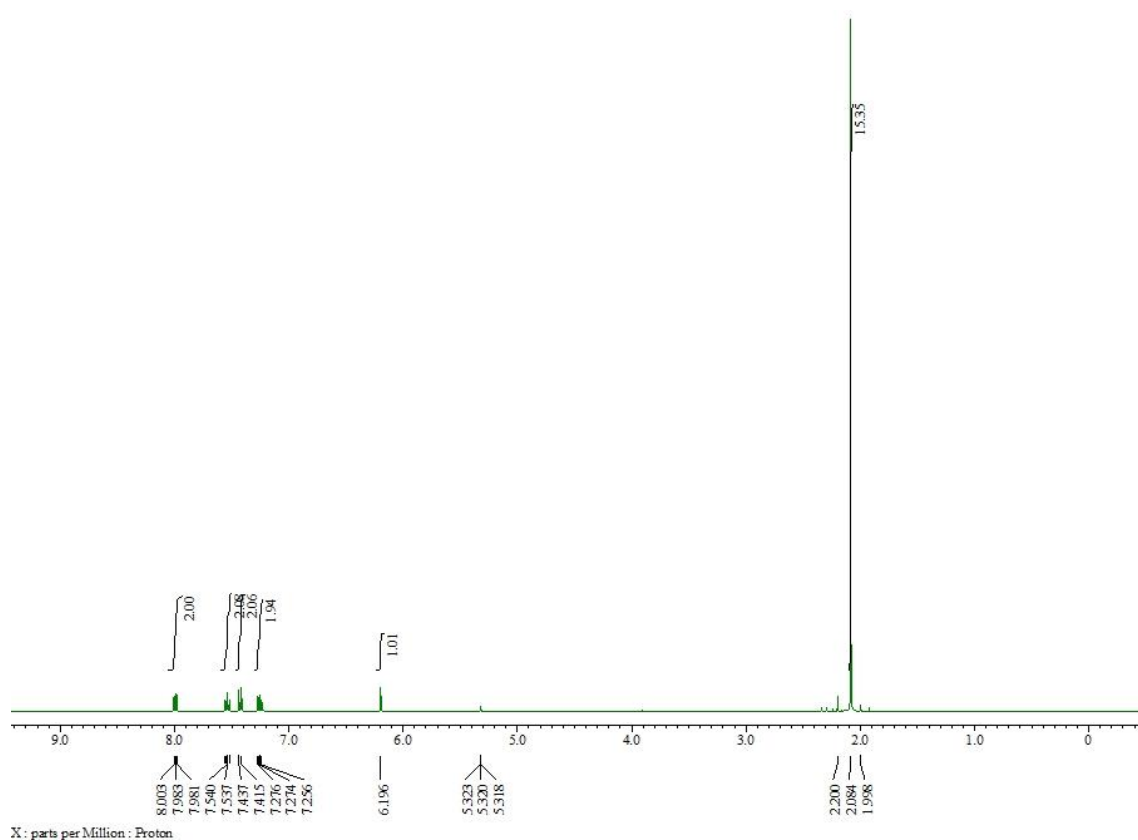

Enlarged view

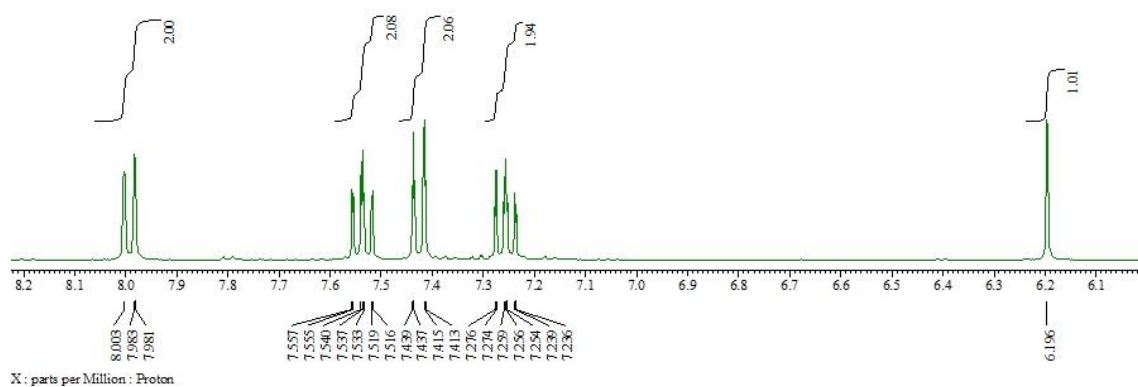

$^{13}\text{C}$  NMR spectrum of  $\text{Cp}^*(\text{fluorenyl})\text{HfCl}_2$  (100 MHz,  $\text{CD}_2\text{Cl}_2$ )

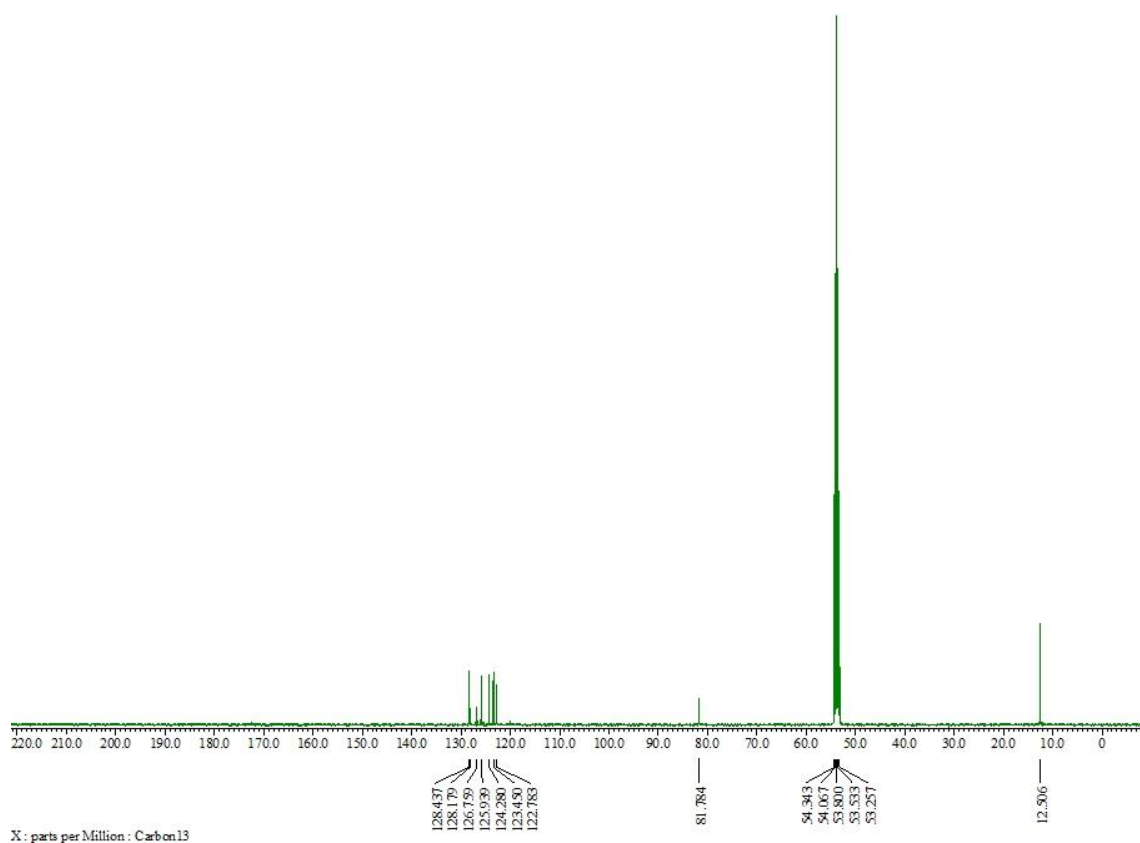

Enlarged view

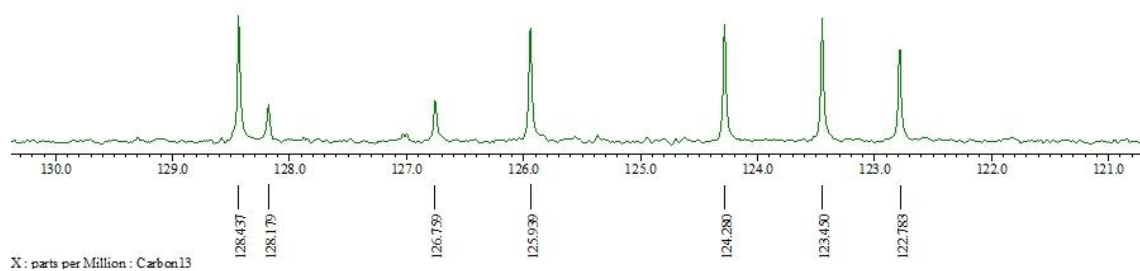

$^1\text{H}$  NMR spectrum of **6** (400 MHz,  $\text{CDCl}_3$ )

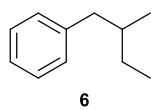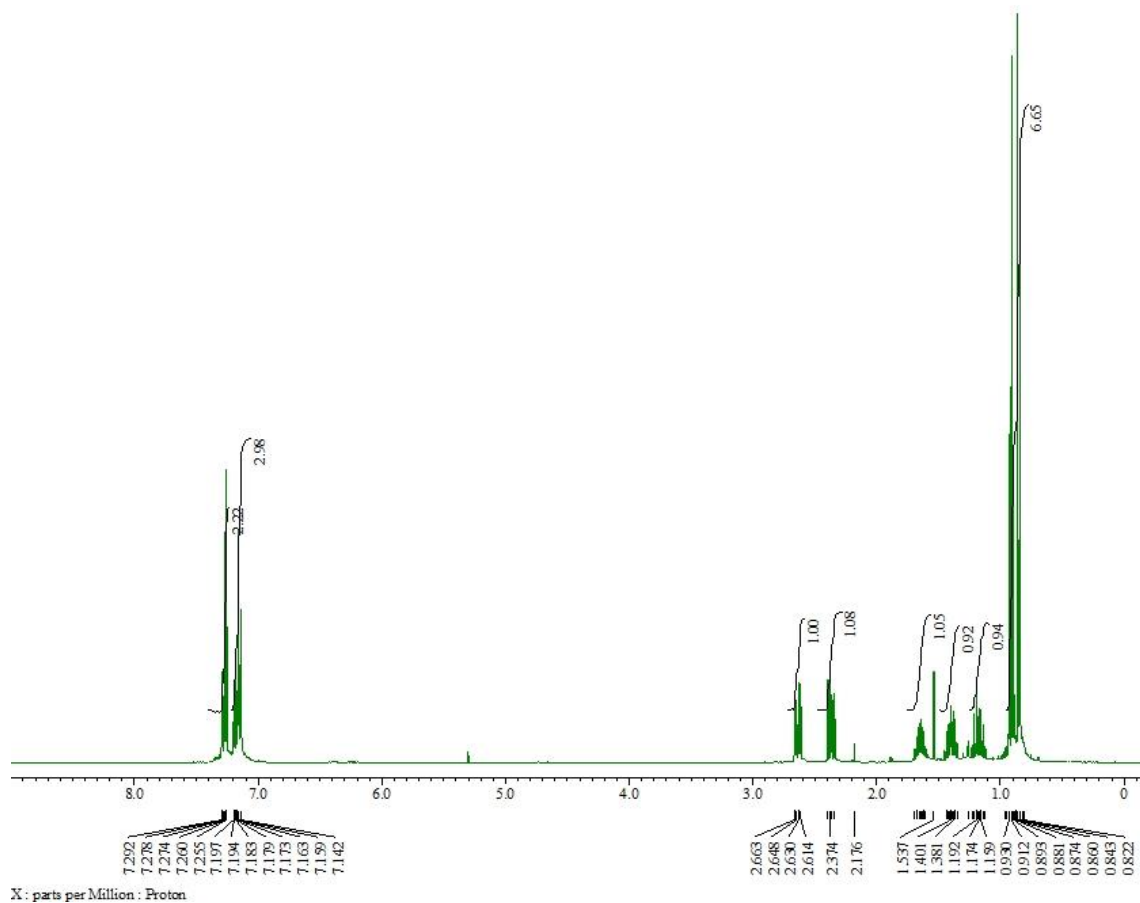

Enlarged view of the  $^1\text{H}$  NMR spectrum of **6** (400 MHz,  $\text{CDCl}_3$ )

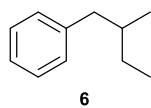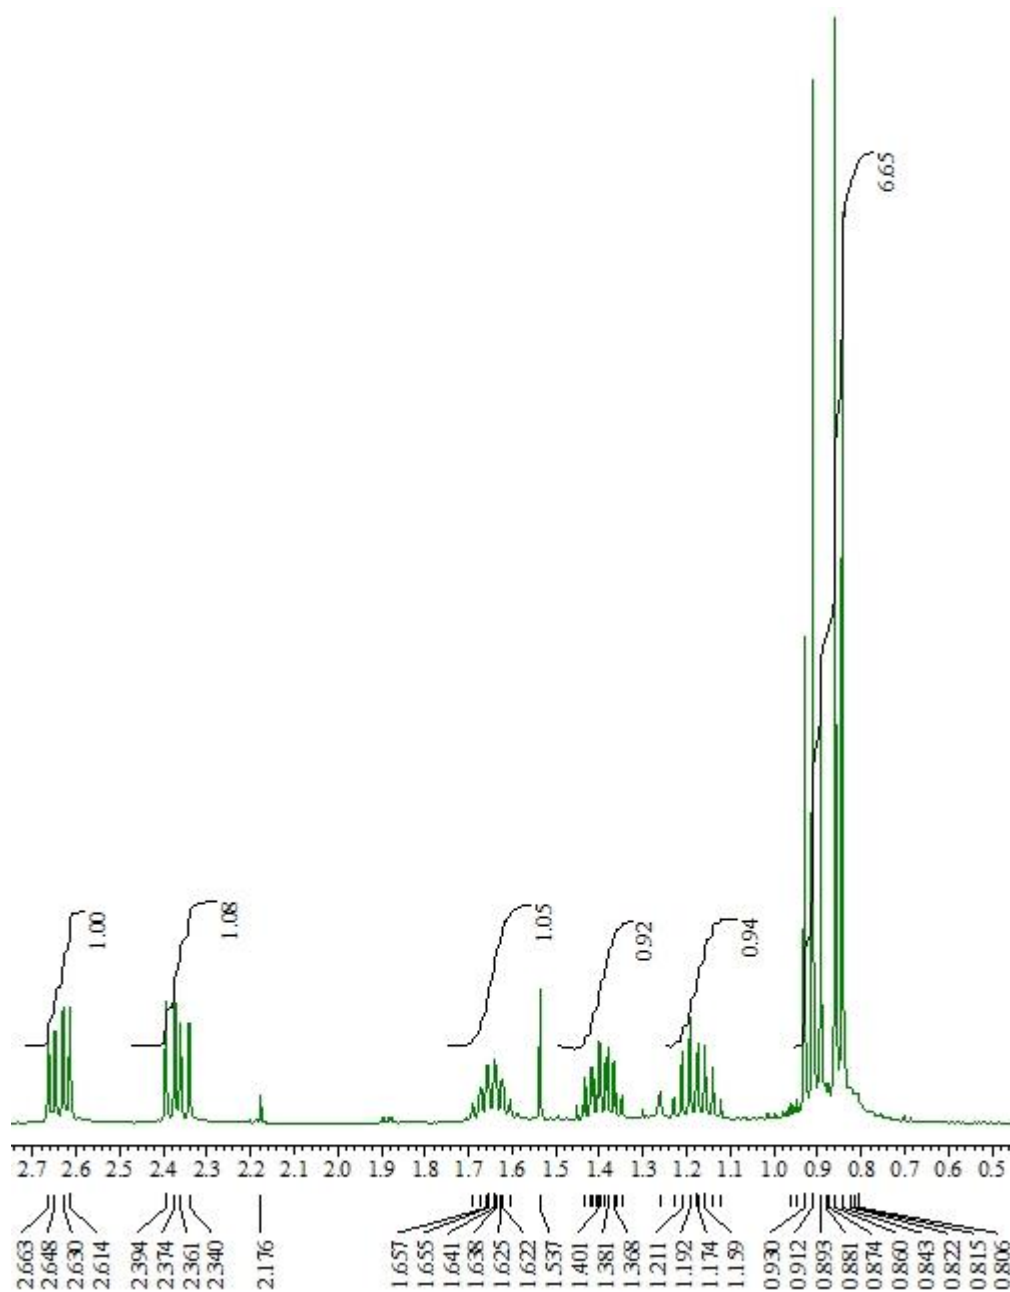

$^{13}\text{C}$  NMR spectrum of **6** (100 MHz,  $\text{CDCl}_3$ )

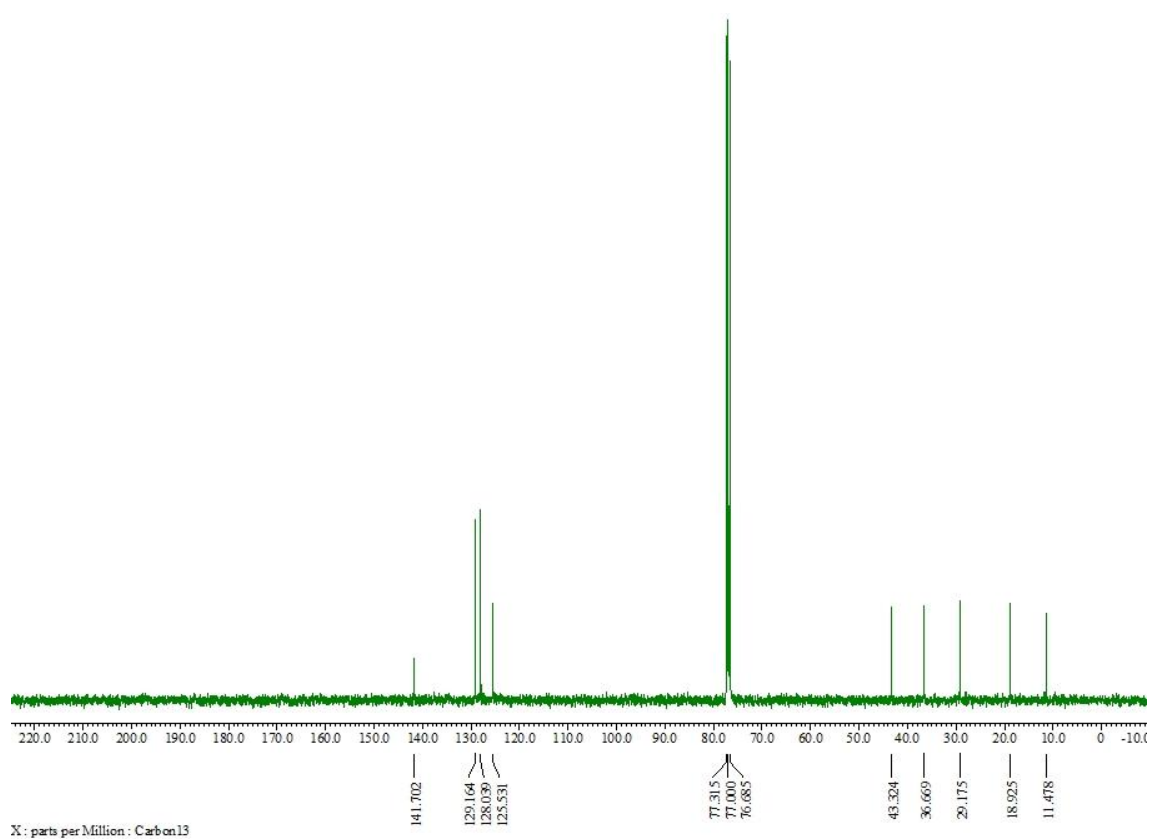

Supplement: c9qo00140a1.pdf [file c9qo00140a1.pdf]
